# Supplementary material
Source: publisher figshare collection journal article supplement (https://geolsoc.figshare.com/ndownloader/files/22732211)
Supplement: Supplementary file 1 [file 22732211]

**Micropaleontological determinations**

**Wajakac sinkhole:**

Locality sampled by P. Maurizot and determinations by Eradata, in 2003, in thin sections.

All samples at the same locality: 167°58’16”, 21°29’24”

Report Eradata, 2003, Microfaciès sédimentaires, biostratigraphie et paléoenvironnements de Nouvelle - Calédonie : Maré. Report 03/CAL 06.

**Samples 2003PM128 to 129 limestone clasts in palagonitic tuffs, with pink rinds that denote thermal alteration:**

Benthic foraminifera: *Austrotrillina howchini* (SCHLUMBERGER), *Flosculinella bontangensis* L.RUTEN, *Marginopora vertebralis* QUOY & GAIMARD, *Gypsina vesicularis* (PARKER & JONES), *Gypsina* sp., *Myogypsina* sp, *Lepidocyclina cf. sumatrensis* (BRADY), *Lepidocyclina* sp., *Amphistegina* sp., *Lobatula* sp., *Planorbulinella* sp., *Cymbaloporella* sp., *Textularia* sp., *Haddonia* sp., *Peneroplis* sp., Calcarinidae, Acervulinidae, frequent small Miliolidae and Textulariidae, Soritidae.

Planctonic foraminifera : rare *Globigerina* sp.

Middle Miocene, Late Langhian to Early Serravalian, biozone M6 (Berggren, 1995).

**Samples 2003PM 124 to 127 Base of Rawa Limestone**

Benthic foraminifera: *Austrotrillina howchini* (SCHLUMBERGER), *Flosculinella bontangensis* L.RUTEN, *Lobatula lobatula* (WALKER & JACOB), *Marginopora vertebralis* QUOY & GAIMARD, Myogypsinidae, *Amphistegina* sp., *Haddonia* sp., *Cycloclypeus* ? sp., *Lepidocyclina* sp., *Sphaerogypsina* sp., *Elphidium* sp., Calcarinidae, small Miliolidae, Textulariidae, Ataxophragmiidae, Soritidae.

Middle Miocene, biozone M6 (Berggren, 1995).

**References**

Berggren, W.A., Kent, D.V., Swisher, C.C. & Aubry, M.P. 1995. A revised cenozoc geochronology and chronostratigraphy. Geochronology Time Scales and Global Stratigraphic Correlation, (Society for Sedimentary Geology (SEPM) Special Publication, 54.
